# Supplementary material for: Hybrid luminescent alginate hydrogels containing lanthanide with potential for acetone sensing
Source: Royal Society of Chemistry journal article supplement (doi:10.1039/c9nj01522a), 2019-01-01
Supplement: c9nj01522a1.pdf [file c9nj01522a1.pdf]

## Supporting Information

### Hybrid luminescent alginate hydrogels containing lanthanide with potential for acetone sensing

Ze-yu Zhang, Han Zhu, Quan-qing Xu, Feng-yi Liu\*, Ai-xin Zhu and Jun-feng Kou\*

*College of Chemistry and Chemical Engineering, Yunnan Normal University, Kunming, 650500, China*

\*E-mail: liufengyi@ynnu.edu.cn

kjf416@163.com

#### Table of Contents:

|                    |                                                                                                                                                                  |
|--------------------|------------------------------------------------------------------------------------------------------------------------------------------------------------------|
| <b>ESI Fig. S1</b> | The EDX-analysis for the YEuAV aerogels.                                                                                                                         |
| <b>ESI Fig. S2</b> | Nitrogen adsorption-desorption isotherms of YEuAV aerogel.                                                                                                       |
| <b>ESI Fig. S3</b> | The comparison of the photoluminescence emission intensity of YEuA and YEuAV hydrogels.                                                                          |
| <b>ESI Fig. S4</b> | The comparison of the excitation spectra of EuA, YEuA and YEuAV hydrogels.                                                                                       |
| <b>ESI Fig. S5</b> | UV absorption spectra of various solvents.                                                                                                                       |
| <b>ESI Fig. S6</b> | The TG and DTG curves of YEuAV aerogel.                                                                                                                          |
| <b>ESI Fig. S7</b> | Time- resolved PL decay curves of the YEuAV hydrogel immersed in different concentration of acetone aqueous solution ."NO" means YEuAV hydrogel without acetone. |

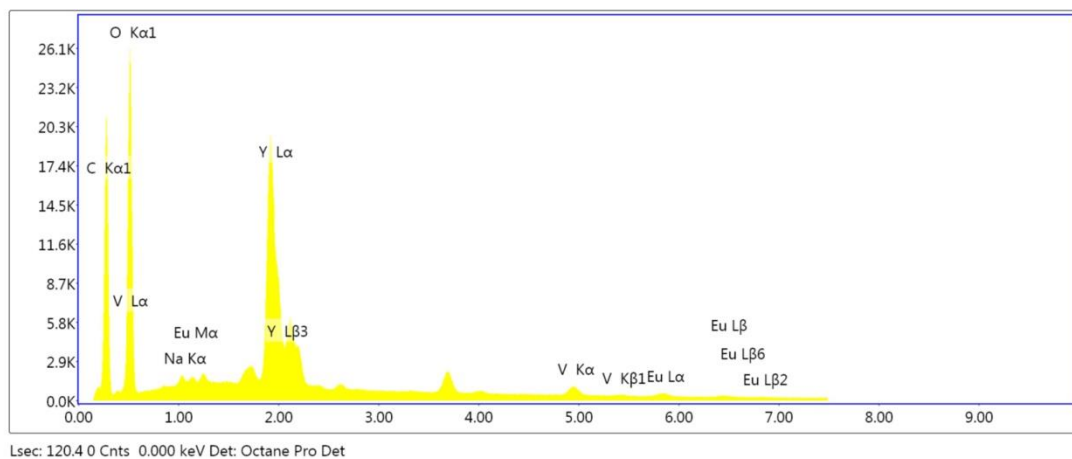

**Figure S1.** The EDX-analysis for the YEuAV aerogels.

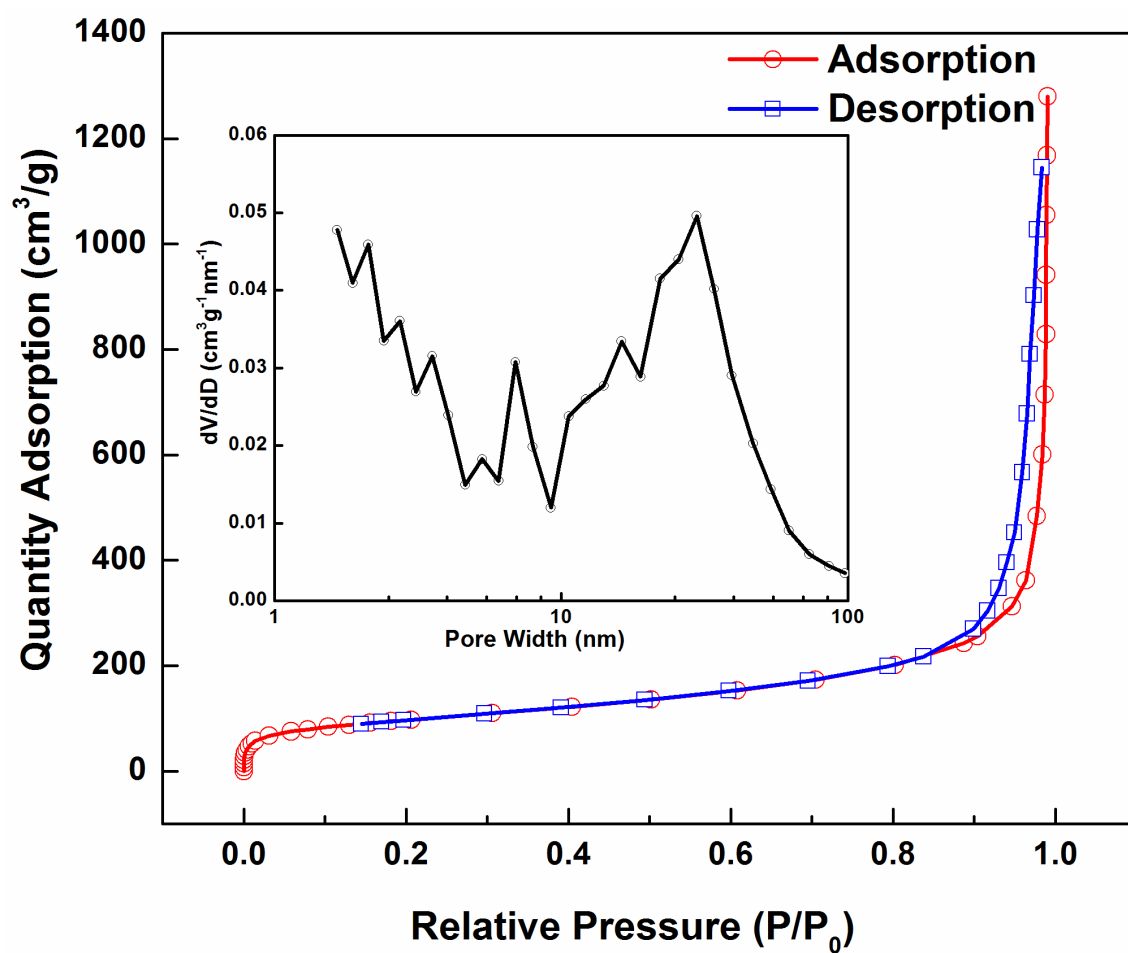

**Figure S2.** Nitrogen adsorption-desorption isotherms of YEuAV aerogel.

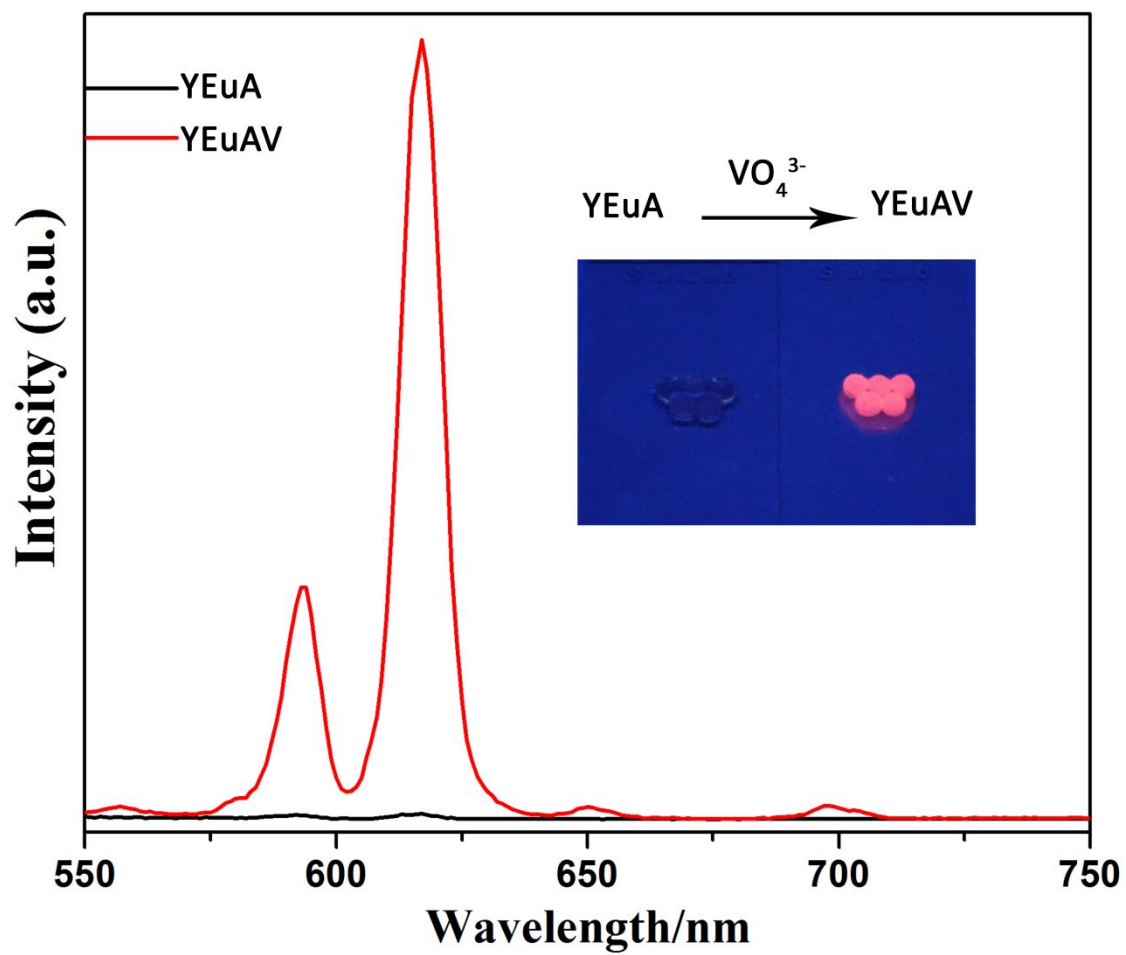

**Figure S3.** The comparison of the photoluminescence emission intensity of YEuA and YEuAV hydrogels.

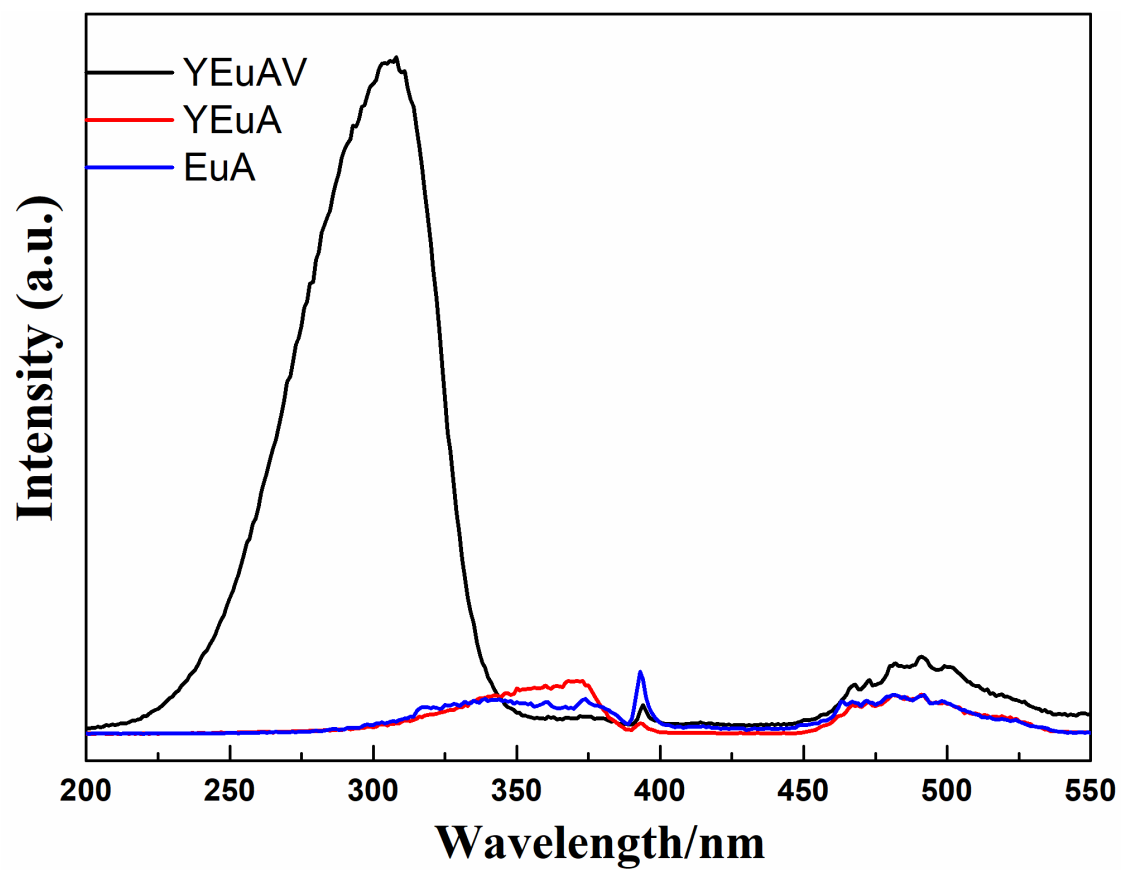

**Figure S4.** The comparison of the excitation spectra of EuA, YEuA and YEuAV hydrogels.

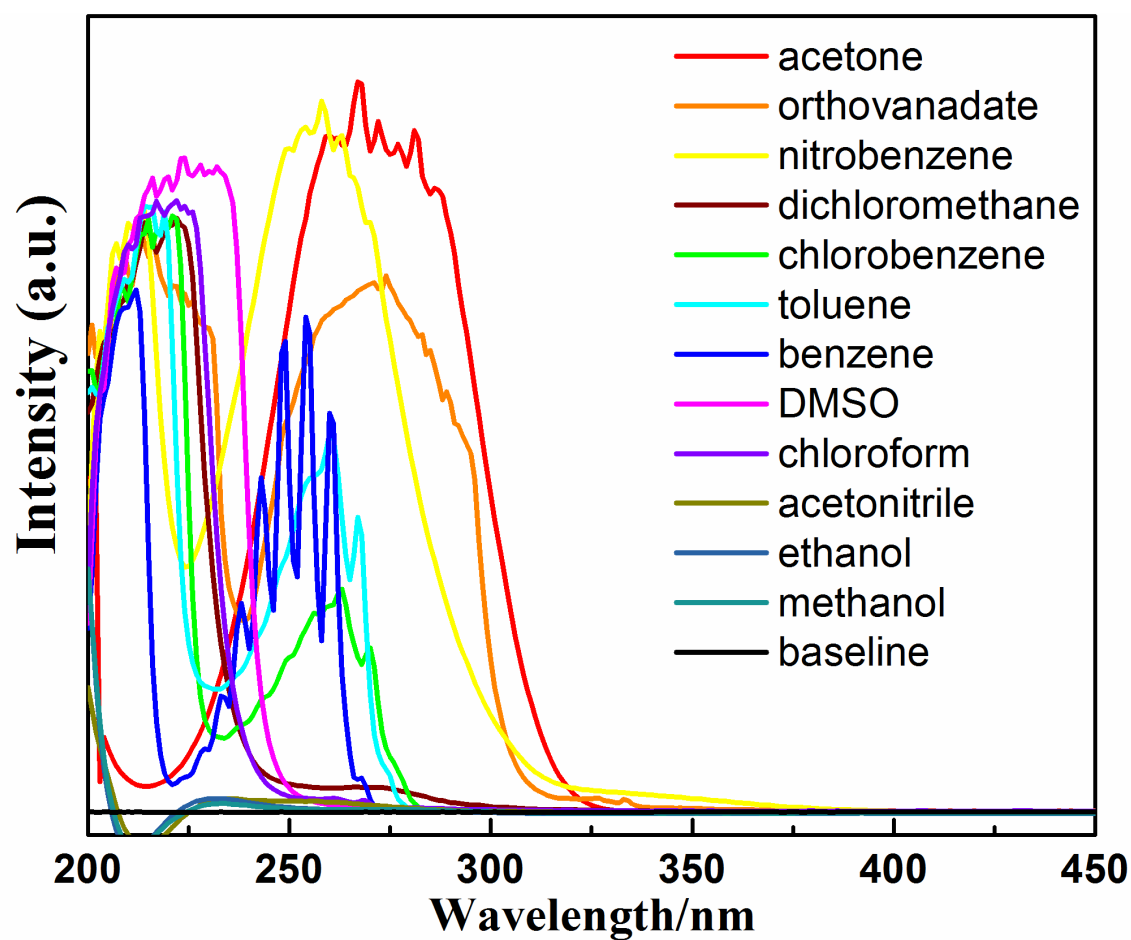

Figure S5. UV absorption spectra of various solvents.

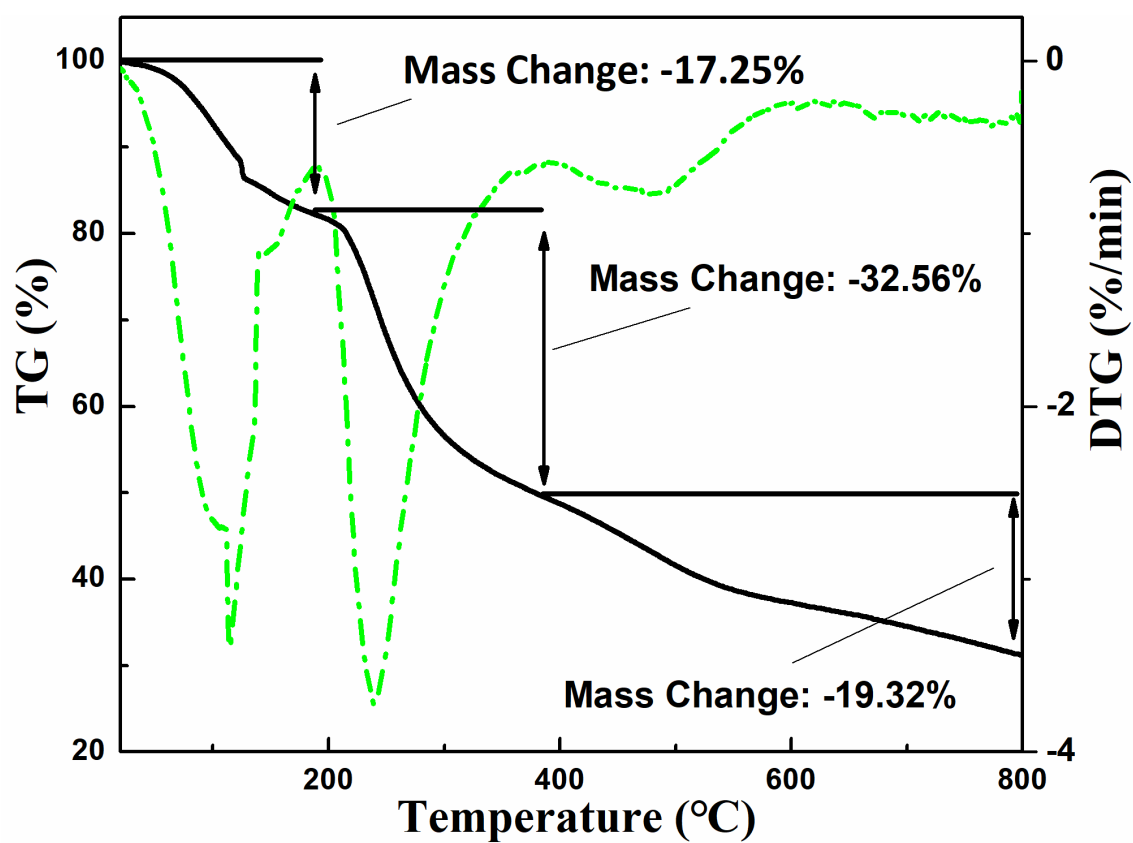

**Figure S6.** The TG and DTG curves of YEuAV aerogel.

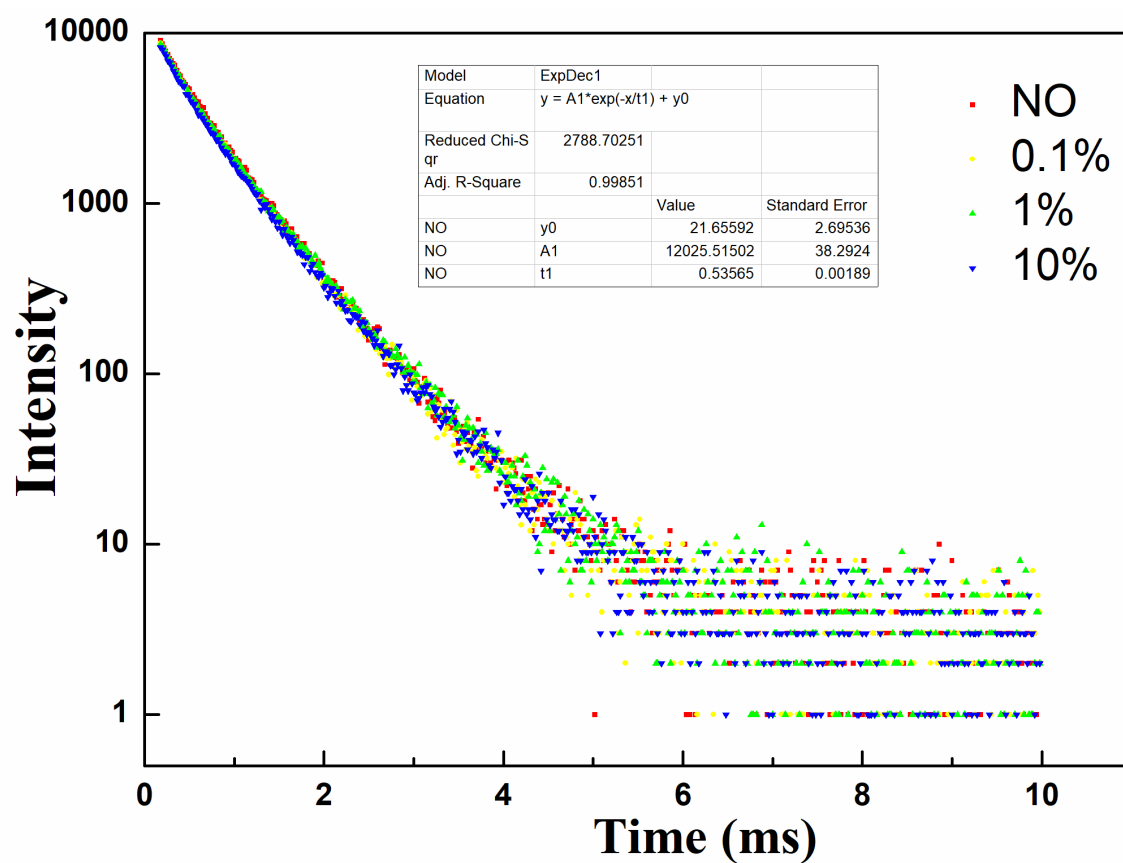

**Figure S7.** Time- resolved PL decay curves of the YEuAV hydrogel immersed in different concentration of acetone aqueous solution. "NO" means YEuAV hydrogel without acetone.
